# Supplementary material
Source: ML conference proceedings conference paper supplement (https://openreview.net/forum?id=WrotwUEJO59)
Supplement: supplementary_material [file attachment]

---

# Supplementary Material: Quantifying and Learning Linear Symmetry-Based Disentanglement

---

Anonymous Author(s)

Affiliation

Address

email

## 1 A Preliminaries: group theory

2 In this appendix, we summarize some concepts from group theory that are important to understand the  
3 main text of the paper. Group theory provides a useful language to formalize the notion of symmetry  
4 transformations and their effects. For a more elaborate discussion we refer the reader to the book  
5 from Hall (2015) on group theory.

6 **Group** A group is a non-empty set  $G$  together with a binary operation  $\circ : G \times G \rightarrow G$  that satisfies  
7 three properties:

- 8 1. *Associativity*: For all  $f, g, h \in G$ , it holds that  $f \circ (g \circ h) = (f \circ g) \circ h$ .
- 9 2. *Identity*: There exists a unique element  $e \in G$  such that for all  $g \in G$  it holds that  
10  $e \circ g = g \circ e = g$ .
- 11 3. *Inverse*: For all  $g \in G$  there exists an element  $g^{-1} \in G$  such that  $g^{-1} \circ g = g \circ g^{-1} = e$ .

12 **Direct product** Let  $G$  and  $G'$  be two groups. The *direct product*, denoted by  $G \times G'$ , is the group  
13 with elements  $(g, g') \in G \times G'$  with  $g \in G$  and  $g' \in G'$ , and the binary operation  $\circ : G \times G' \rightarrow G \times G'$   
14 such that  $(g, g') \circ (h, h') = (g \circ h, g' \circ h')$ .

15 **Lie group** A Lie group is a group where  $G$  is a smooth manifold, this means it can be described in  
16 a local scale with a set of continuous parameters and that one can interpolate continuously between  
17 elements of  $G$ .

18 **Group action** Let  $A$  be a set and  $G$  a group. The *group action* of  $G$  on  $A$  is a function  
19  $G_A : G \times A \rightarrow A$  that has the properties <sup>1</sup>

- 20 1.  $G_A(e, x) = x$  for all  $a \in A$
- 21 2.  $G_A(g, (G_A(g', a))) = G_A(g \circ g', a)$  for all  $g, g' \in G$  and  $a \in A$

22 **Regular action** The action of  $G$  on  $A$  is regular if for every pair of elements  $a, a' \in A$  there exists  
23 a unique  $g \in G$  such that  $g \cdot a = a'$ .

24 **Group representation** A *group representation* of  $G$  in the vector space  $V$  is a function  $\rho : G \rightarrow$   
25  $GL(V)$  (where  $GL(V)$  is the general linear group on  $V$ ) such that for all  $g, g' \in G$   $\rho(g \circ g') =$   
26  $\rho(g) \circ \rho(g')$  and  $\rho(e) = \mathbb{I}_V$ , where  $\mathbb{I}_V$  is the identity matrix.

---

<sup>1</sup>To avoid notational clutter, we write  $G_A(g, a) = g \cdot a$  where the set  $A$  on which  $g \in G$  acts can be inferred from the context.

27 **Direct sum of representations** The direct sum of two representations  $\rho_1 : G \rightarrow GL(V)$  in  $V$  and  
 28  $\rho_2 : G \rightarrow GL(V')$  in  $V'$  is a group representation  $\rho_1 \oplus \rho_2 : G \rightarrow GL(V \oplus V')$  over the direct sum  
 29  $V \oplus V'$ , defined for  $v \in V$  and  $v' \in V'$  as:

$$(\rho_1 \oplus \rho_2)(g) \cdot (v, v') = (\rho_1(g) \cdot v, \rho_2(g) \cdot v') \quad (1)$$

## 30 B Linear Symmetry-Based Disentanglement: Detailed Description

31 Higgins et al. (2018) provide a formal definition of linear disentanglement that connects symmetry  
 32 transformations affecting the real world (from which data is generated) to the internal representations  
 33 of a model. In the main text, we provide a definition from the perspective of a group action on the  
 34 data directly, but the original definition considers an extra conceptual world state as well. Here, we  
 35 describe the original setting in more detail, and explain why we choose a more direct and practical  
 36 version of the definition.

37 The definition assumes the following setting.  $W$  is the set of possible world states, with underlying  
 38 symmetry transformations that are described by a group  $G$  and its action  $\cdot : G \times W \rightarrow W$  on  $W$ . In  
 39 particular,  $G$  can be decomposed as the direct product of  $K$  groups  $G = G_1 \times \dots \times G_K$ . Data is  
 40 obtained via an *observation* function  $b : W \rightarrow X$  that maps world states to observations in a *data*  
 41 *space*  $X$ . A model’s internal representation of data is modeled with the *encoding* function  $h : X \rightarrow Z$   
 42 that maps data to the *embedding space*  $Z$ . Together, the observation and the encoding constitute the  
 43 model’s internal representation of the real world  $f : W \rightarrow Z$  with  $f(w) = h \circ b(w)$ . The definition  
 44 for Linearly Symmetry-Based Disentangled (LSBD) representations then formalizes the requirement  
 45 that a model’s internal representation  $f$  should reflect and disentangle the transformation properties  
 46 of the real world, and that the transformation properties of the model’s internal representations should  
 47 be linear.

48 The original definition considers  $G$  acting on  $W$  and involves the model’s internal representation  
 49  $f : W \rightarrow Z$ , but since we do not directly observe  $W$  it is more practical to evaluate LSBD with  
 50 respect to the encoding map  $h : X \rightarrow Z$  instead. If the action of  $G$  on  $W$  is *regular*<sup>2</sup> and the  
 51 observation map  $b : W \rightarrow X$  is *injective*<sup>3</sup> though, we can instead define LSBD with respect to the  
 52 action of  $G$  on  $X$  and the encoding map  $h$ , as shown in the main text.

## 53 C Inner Product

54 To describe the norm  $\|\cdot\|_{\rho, h, \mu}$  used in the definition of  $\mathcal{D}_{\text{LSBD}}$  we start with an arbitrary inner  
 55 product  $(\cdot, \cdot)$  on the linear latent space  $Z$ . Assume that  $\rho$  is linearly disentangled and accordingly  
 56 splits in irreducible representations  $\rho_k : G \rightarrow Z_k$  where  $Z = Z_1 \oplus \dots \oplus Z_K$  for some  $K \in \mathbb{N}$ . We  
 57 will define a new inner product  $\langle \cdot, \cdot \rangle_{\rho, h, \mu}$  on  $Z$  as follows. First of all we declare  $Z_k$  and  $Z_m$  to be  
 58 orthogonal with respect to  $\langle \cdot, \cdot \rangle_{\rho, h, \mu}$  if  $k \neq m$ . We denote by  $\pi_k$  the orthogonal projection on  $Z_k$ .

59 For  $z, z' \in Z_i$ , we set

$$\langle z, z' \rangle_{\rho, h, \mu} := \lambda_{k, h, \mu}^{-1} \int_{g \in G} (\rho(g) \cdot z, \rho(g) \cdot z') d\mathbf{m}(g) \quad (2)$$

60 where  $\mathbf{m}$  is the (bi-invariant) Haar measure normalized such that  $\mathbf{m}(G) = 1$  and set

$$\lambda_{k, h, \mu} := \int_X \int_G \|\pi_k(h(x))\|^2 d\mathbf{m}(g) d\mu(x) \quad (3)$$

61 if the integral on the right-hand side is strictly positive and otherwise we set  $\lambda_k := 1$ . This construction  
 62 completely specifies the new inner product, and it has the following properties:

- 63 • the subspaces  $Z_k$  are mutually orthogonal,
- 64 •  $\rho_k(g)$  is orthogonal on  $Z_k$  for every  $g \in G$ , in other words  $\rho_k$  maps to the orthogonal group  
 65 on  $Z_k$ . Moreover,  $\rho$  maps to the orthogonal group on  $Z$ . This follows directly from the  
 66 bi-invariance of the Haar measure and the definition of  $\langle \cdot, \cdot \rangle_{\rho, h, \mu}$ .

<sup>2</sup>This assumption holds in most practical cases with a suitable description of  $G$ .

<sup>3</sup>This is typically the case, but if not it can be solved through active sensing, see Soatto (2011).

67 • If  $\pi_k$  is the orthogonal projection to  $Z_k$ , then

$$\int_X \|\pi_k(h(x))\|_{\rho, h, \mu}^2 d\mu(x) = 1 \quad (4)$$

68 if the integral on the left is strictly positive.

69 For an arbitrary pair  $z, z' \in Z$  the inner product  $\langle \cdot, \cdot \rangle_{\rho, h, \mu}$  is given by

$$\langle z, z' \rangle_{\rho, h, \mu} = \sum_{k=1}^K \lambda_{k, h, \mu}^{-1} \int_{g \in G} (\rho(g) \cdot \pi_k(z), \rho(g) \cdot \pi_k(z')) d\mathbf{m}(g) \quad (5)$$

## 70 D Evaluation of Equivariance by $\mathcal{D}_{\text{LSBD}}$

71 We will now give an alternative expression for the disentanglement metric  $\mathcal{D}_{\text{LSBD}}$ , since it will more  
 72 visibly relate to the definition of equivariance. To avoid notational cluttering, in this section we will  
 73 denote the norm  $\|\cdot\|_{\rho, h, \mu}$  as  $\|\cdot\|_*$ . Let  $\rho \in \mathcal{P}(G, Z)$  be a linear disentangled representation of  $G$   
 74 in  $Z$ . By expanding the inner product (or by using usual computation rules for expectations and  
 75 variances), we first find that

$$\begin{aligned} & \int_G \left\| \rho(g)^{-1} \cdot h(g \cdot x_0) - \int_G \rho(g')^{-1} \cdot h(g' \cdot x_0) d\nu(g') \right\|_*^2 d\nu(g) \\ &= \int_G \left\| \rho(g)^{-1} \cdot h(g \cdot x_0) \right\|_*^2 d\nu(g) - \left\| \int_G \rho(g)^{-1} \cdot h(g \cdot x_0) d\nu(g) \right\|_*^2 \\ &= \frac{1}{2} \int_G \int_G \left\| \rho(g)^{-1} \cdot h(g \cdot x_0) - \rho(g')^{-1} \cdot h(g' \cdot x_0) \right\|_*^2 d\nu(g) d\nu(g'). \end{aligned} \quad (6)$$

76 We now use that  $\rho$  maps to the orthogonal group for  $(\cdot, \cdot)_*$ , so that we can write the same expression  
 77 as

$$\frac{1}{2} \int_G \int_G \left\| \rho(g \circ g'^{-1})^{-1} \cdot h((g \circ g'^{-1}) \cdot g') \cdot x_0 - h(g' \cdot x_0) \right\|_*^2 d\nu(g) d\nu(g'). \quad (7)$$

78 This brings us to the alternative characterization of  $\mathcal{D}_{\text{LSBD}}$  as

$$\mathcal{D}_{\text{LSBD}} = \inf_{\rho \in \mathcal{P}(G, Z)} \frac{1}{2} \int_G \int_G \left\| \rho(g \circ g'^{-1})^{-1} h((g \circ g'^{-1}) \cdot g') \cdot x_0 - h(g' \cdot x_0) \right\|_*^2 d\nu(g) d\nu(g'). \quad (8)$$

79 In particular, if for every data point  $x$  there is a unique group element  $g_x$  such that  $x = g_x \cdot x_0$ , the  
 80 disentanglement metric  $\mathcal{D}_{\text{LSBD}}$  can also be written as

$$\inf_{\rho \in \mathcal{P}(G, Z)} \frac{1}{2} \int_G \int_X \left\| \rho(g \circ g_x^{-1})^{-1} h((g \circ g_x^{-1}) \cdot x) - h(x) \right\|_*^2 d\nu(g) d\mu(x), \quad (9)$$

81 in which the equivariance condition appears prominently. The condition becomes even more apparent  
 82 if  $\nu$  is in fact the Haar measure itself, in which case the metric equals

$$\inf_{\rho \in \mathcal{P}(G, Z)} \frac{1}{2} \int_G \int_X \left\| \rho(g)^{-1} \circ h(g \cdot x) - h(x) \right\|_*^2 d\mathbf{m}(g) d\mu(x). \quad (10)$$

## 83 E Datasets

84 All datasets contain  $64 \times 64$  pixel images. The Square, Arrow and Airplane datasets have a known  
 85 group decomposition  $G = \text{SO}(2) \times \text{SO}(2)$  describing the underlying transformations. In these  
 86 three datasets, for each subgroup a fixed number of  $|\mathcal{G}_k| = 64$  with  $k \in \{1, 2\}$  transformations is  
 87 selected. Each image is generated from a single initial data point upon which all possible group  
 88 actions are applied, resulting in datasets with  $|\mathcal{G}_1| \cdot |\mathcal{G}_2| = 4096$  images. The datasets exemplify  
 89 different group actions of  $\text{SO}(2)$ : periodic translations, in-plane rotations, out-of-plane rotations, and  
 90 periodic hue-shifts, see Figure 1.

91 The ModelNet40 and the COIL-100 datasets consist of different objects rotating with respect to a  
 92 vertical axis (out-of-plane rotation). For these datasets the group  $G = \text{SO}(2)$  describes the underlying  
 93 transformations that each object undergoes, see Figure 1. The different objects can be seen as non-  
 94 symmetric variability in the data. In this particular case, each object has its own base-point  $x_0$  from  
 95 which data is generated. The metric  $\mathcal{D}_{\text{LSBD}}$  is then evaluated per object instance for the group  
 96  $G = \text{SO}(2)$ , the value of  $\mathcal{D}_{\text{LSBD}}$  is calculated and averaged across all available objects.

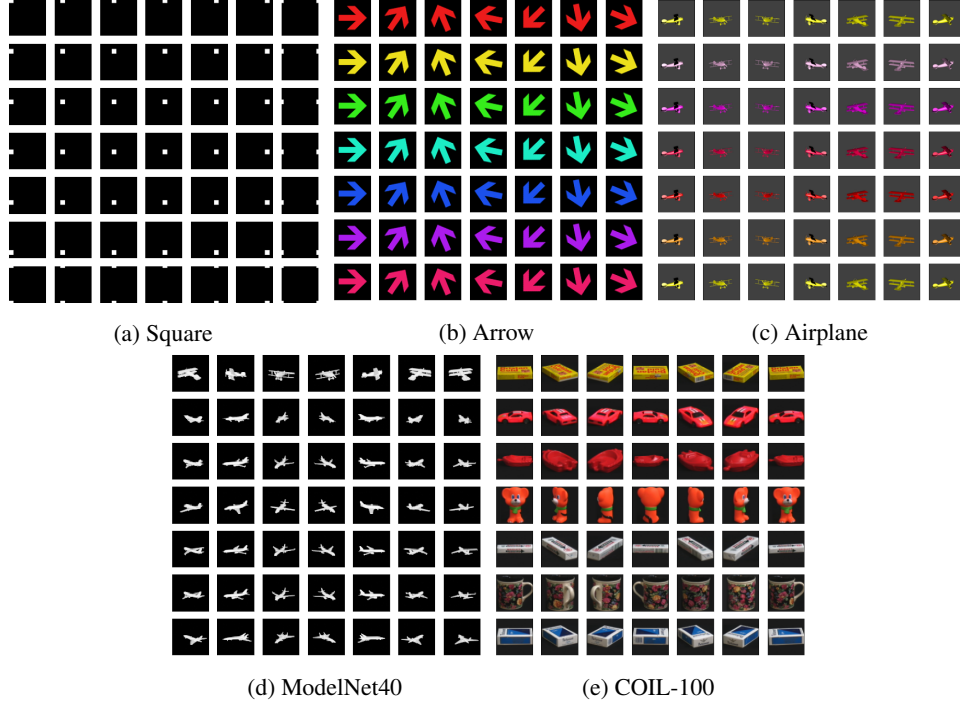

Figure 1: Example images from each of the datasets used. Each image corresponds to an example data point for a combination of two factors, e.g. color and orientation. The factors change horizontally and vertically. The boundaries for the Square, Arrow and Airplane dataset are periodic. For the ModelNet40 and COIL-100 dataset, the vertical direction represents different object instances and the horizontal direction represents the rotation of the corresponding object.

97 **Square** This dataset consists of a set of images of a black background with a square of  $4 \times 4$  white  
 98 pixels. The dataset is generated applying vertical and horizontal translations of the white square  
 99 considering periodic boundaries.

100 **Arrow** This dataset consists of a set of images depicting a colored arrow at a given orientation. The  
 101 dataset is generated by applying cyclic shifts of its color and in-plane rotations. The cyclic color  
 102 shifts were obtained by preselecting a fixed set of 64 colors from a circular hue axis. The in-plane  
 103 rotations were obtained by rotating the arrow along an axis perpendicular to the picture plane over 64  
 104 predefined positions.

105 **Airplane** This dataset consists of renders obtained using Blender v2.7 (Community, 2020) from a  
 106 3D model of an airplane within the ModelNet40 dataset (Wu et al., 2014) (this dataset is provided for  
 107 the convenience of academic research only). We created each image by varying two properties: the  
 108 airplane’s color and its orientation with respect to the render camera. The orientation was changed via  
 109 rotation with respect to a vertical axis (out-of-plane rotation). The colors of the model were selected  
 110 from a predefined cyclic set of colors similar to the arrow rotation dataset.

111 **ModelNet40** This dataset also consists of a dataset of renders obtained using Blender v2.7 (Com-  
 112 munity, 2020) from all the 3D models within the airplane category of the ModelNet40 dataset (Wu  
 113 et al., 2014). We created each image by varying each airplane’s orientation with respect to the render  
 114 camera, via rotation with respect to a vertical axis (out-of-plane rotation). In this case we used 64  
 115 orientations for each object, i.e.  $|\mathcal{G}| = 64$ .

116 **COIL-100** This dataset (Nene et al., 1996) consists of images from 100 objects placed on a turntable  
 117 against a black background. For each object, 72 views of the rotated object are provided. The original  
 118 images have a resolution of  $128 \times 128$  and were re-scaled to  $64 \times 64$  to match our other datasets. In

119 this case for each object  $|\mathcal{G}| = 72$ . This dataset is intended for non-commercial research purposes  
 120 only. This dataset was obtained by using TensorFlowDatasets (2021).

## 121 F Experimental Settings and Hyperparameters

### 122 F.1 Architectures

123 Table 1 shows the encoder and decoder architectures used for almost all methods and datasets. The  
 124 encoder’s last layer depends on the method. For VAE, cc-VAE, FactorVAE, DIP-I, DIP-II, two dense  
 125 layers with 4 units each were used. For LSBD-VAE and  $\Delta$ VAE two dense layers with 4 and 2 units  
 126 each were used. For Quessard a single dense layer with 4 units was used. The only model that was  
 127 not trained with this architectures was LSBD-VAE/0 method for the ModelNet40 dataset the reason  
 128 for this choice was that during training the loss was getting NaN values, in this case the architecture  
 129 used was that of Table 2.

Table 1: Encoder and decoder architectures used in most methods.

| ENCODER   |                                                        |
|-----------|--------------------------------------------------------|
| INPUT     | SIZE (64,64, NUMBER CHANNELS)                          |
| CONV      | FILTERS 32, KERNEL 4, STRIDE 2, ReLU                   |
| CONV      | FILTERS 32, KERNEL 4, STRIDE 2, ReLU                   |
| CONV      | FILTERS 64, KERNEL 4, STRIDE 2, ReLU                   |
| CONV      | FILTERS 64, KERNEL 4, STRIDE 2, ReLU                   |
| DENSE     | UNITS 256, ReLU                                        |
| DENSE(X2) | UNITS DEPEND ON METHOD                                 |
| DECODER   |                                                        |
| INPUT     | SIZE (NUMBER OF LATENT DIMENSIONS)                     |
| DENSE     | UNITS 256, ReLU                                        |
| DENSE     | UNITS 4*4*64, ReLU                                     |
| RESHAPE   | (4,4,64)                                               |
| CONVT     | FILTERS 64, KERNEL 4, STRIDE 2, ReLU                   |
| CONVT     | FILTERS 32, KERNEL 4, STRIDE 2, ReLU                   |
| CONVT     | FILTERS 32, KERNEL 4, STRIDE 2, ReLU                   |
| CONVT     | FILTERS (NUMBER CHANNELS), KERNEL 4, STRIDE 2, SIGMOID |

Table 2: Encoder and decoder architecture used to train LSBD-VAE/0 for ModelNet40 dataset.

| ENCODER   |                                         |
|-----------|-----------------------------------------|
| INPUT     | SIZE (64, 64, NUMBER CHANNELS)          |
| DENSE     | UNITS 512, ReLU, BATCH NORMALIZATION    |
| DENSE     | UNITS 256, ReLU, BATCH NORMALIZATION    |
| DENSE(X2) | UNITS DEPEND ON METHOD                  |
| DECODER   |                                         |
| INPUT     | SIZE (NUMBER OF LATENT DIMENSIONS)      |
| DENSE     | UNITS 256, ReLU, BATCH NORMALIZATION    |
| DENSE     | UNITS 512, ReLU, BATCH NORMALIZATION    |
| DENSE     | UNITS 64*64*NUMBER OF CHANNELS, SIGMOID |
| RESHAPE   | (64, 64, NUMBER OF CHANNELS)            |

### 130 F.2 Hyperparameters

131 Table 3 shows the hyperparameters used to train each model for all datasets. Table 4 shows the  
 132 hyperparameters used to train the LSBD-VAE models for each dataset. In the latter case, the number  
 133 of epochs for the LSBD-VAE model were increased. The range of values used for the scale parameter  
 134  $t$  were increased for ModelNet40 and COIL-100 datasets since it was noticed that this provided

135 better results in terms of data reconstruction and disentanglement. For the Arrow dataset, a value  
 136 of  $\gamma = 1$  was producing unstable results. However, the values 10, 100, 1000 or even 10000 were  
 137 producing good results without significant changes among them. Therefore the value 100 was used  
 138 for the datasets with the same structure (Square, Arrow and Airplane). For the ModelNet40 and  
 139 COIL-100 the experiments showed that this hyperparameter for values as high as 10000 could affect  
 140 the reconstructions, thus a lower value  $\gamma = 1$  was chosen.

Table 3: Model hyperparameters for all datasets

| MODEL        | PARAMETERS                                                                                |
|--------------|-------------------------------------------------------------------------------------------|
| VAE          | TRAINING STEPS 30000                                                                      |
| $\beta$ -VAE | $\beta = 5$ , TRAINING STEPS 30000                                                        |
| CC-VAE       | $\beta = 5, \gamma = 1000, c_{max} = 15$ , ITERATION THRESHOLD 3500, TRAINING STEPS 30000 |
| FACTOR       | $\gamma = 1$ , EPOCHS 30000                                                               |
| DIP-I        | $\lambda_{od} = 1, \lambda_d = 10$ , TRAINING STEPS 30000                                 |
| DIP-II       | $\lambda_{od} = 1, \lambda_d = 1$ , TRAINING STEPS 30000                                  |
| QUESSARD     | $\lambda = 0.01$ , TRAJECTORIES 3000                                                      |

Table 4: LSB-D-VAE hyperparameters for all datasets

| DATASETS                | PARAMETERS                                                   |
|-------------------------|--------------------------------------------------------------|
| SQUARE, ARROW, AIRPLANE | $t \in [10^{-10}, 10^{-9}]$ , $\gamma = 100.0$ , EPOCHS 1500 |
| MODELNET40              | $t \in [10^{-10}, 10^{-5}]$ , $\gamma = 1.0$ , EPOCHS 1500   |
| COIL-100                | $t \in [10^{-10}, 10^{-5}]$ , $\gamma = 1.0$ , EPOCHS 6000   |

### 141 F.3 Hardware & Running Time

142 The hardware used across all experiments was a DGX station with 4 NVIDIA GPUs V100 and  
 143 32GB . Only one GPU was used per experiment. The running time for the LSB-D-VAE across all 9  
 144 degrees of supervision  $L \in \{0, 256, 768, 1024, 1280, 1536, 1792, 2048\}$  and all 10 runs (total  $9 \cdot 10$   
 145 repetitions) for the datasets were: Arrow  $33 \pm 4$  minutes Airplane  $29 \pm 4$  minutes and Square  $28 \pm 4$   
 146 minutes. The running time for the LSB-D-VAE across 2 degrees of supervision and 10 runs (total  
 147  $2 \cdot 10$  repetitions) for ModelNet40 was  $136 \pm 10$  minutes and for COIL-100  $90 \pm 6$  minutes. For  
 148 the method from (Quessard et al., 2020) the training times were approximately 30 minutes across all  
 149 datasets. The training times for the methods from `disentanglement_lib` (Locatello et al., 2019)  
 150 were not measured.

### 151 F.4 Code Licenses

152 The `disentanglement_lib` (Locatello et al., 2019) code is registered with an Apache 2.0 License  
 153 while the code used to reproduce the method by Quessard et al. (2020) is registered with an MIT  
 154 license.

## 155 G Full results

156 The full results for all experiments on all datasets are given in Tables 5, 6, 7, 8, and 9. We report the  
 157 mean and standard deviation over 10 runs for each experiment.

### 158 G.1 Limited Supervision Suffices to Learn LSB-D Representations

159 The results obtained from Tables 5, 6, 7 show that we do not need transformation-labels for all data  
 160 points, only a subset of labeled pairs is sufficient to learn LSB-D representations. To further highlight  
 161 this, Figure 2 shows  $\mathcal{D}_{\text{LSB-D}}$  scores for LSB-D-VAE trained on the Square, Arrow, and Airplane  
 162 datasets respectively, for various values for the number of labeled pairs  $L$ . For each  $L$  and each  
 163 dataset, we trained 10 models so we can report box plots of the  $\mathcal{D}_{\text{LSB-D}}$  scores.

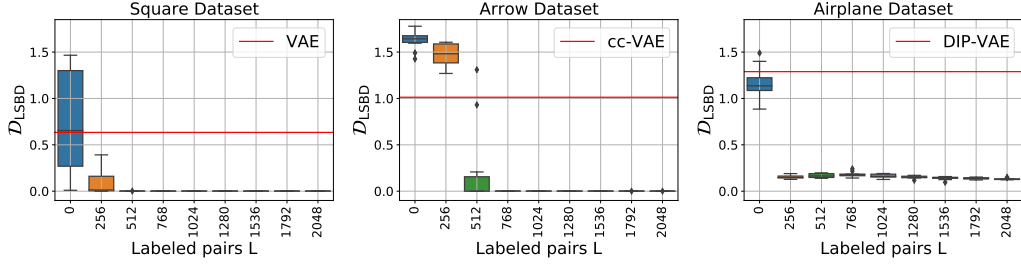

Figure 2: Box plots for  $\mathcal{D}_{\text{LSBD}}$  scores over 10 training repetitions for different numbers of labeled pairs  $L$ , for all datasets. The red line indicates the best-performing traditional disentanglement method.

For low values of  $L$  we see worse scores and high variability. But for slightly higher  $L$ , scores are consistently good, starting already at  $L = 512$  for the Square,  $L = 768$  for the Arrow, and  $L = 256$  for the Airplane. This corresponds to respectively 25%, 37.5%, and 12.5% of the data being involved in a labeled pair. Moreover, we see that with just a little supervision we outperform the best traditional method on  $\mathcal{D}_{\text{LSBD}}$ . Overall, these results suggest that with some expert knowledge (about the underlying group and a suitable representation) and limited annotation of transformations, LSBD can be achieved.

## G.2 Quessard Arrow

In the main text we mentioned that we did not reproduce good results with Quessard et al. (2020)’s method on the Arrow and Square dataset. We highlight a particular case for the Arrow dataset, where the method clearly learns the rotations of the arrow but fails to learn color. Figure 3 shows reconstructed Arrow images. Since color isn’t learned well, this example doesn’t get a good  $\mathcal{D}_{\text{LSBD}}$  score, even though rotation is properly linearly disentangled.

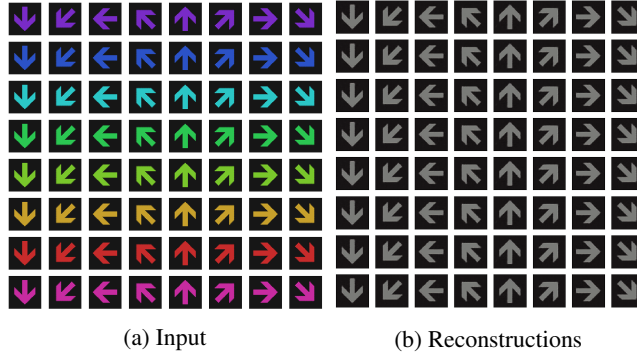

Figure 3: Results from Quessard et al. (2020)’s method on the Arrow dataset

## References

- Community, B. O. (2020). *Blender - a 3D modelling and rendering package*. Blender Foundation, Stichting Blender Foundation, Amsterdam.
- Hall, B. C. (2015). *Lie Groups, Lie Algebras, and Representations*, volume 222 of *Graduate Texts in Mathematics*. Springer International Publishing, Cham.
- Higgins, I., Amos, D., Pfau, D., Racaniere, S., Matthey, L., Rezende, D., and Lerchner, A. (2018). Towards a definition of disentangled representations. *arXiv preprint arXiv:1812.02230*.
- Locatello, F., Bauer, S., Lucic, M., Gelly, S., Schölkopf, B., and Bachem, O. (2019). Challenging common assumptions in the unsupervised learning of disentangled representations. In *International Conference on Machine Learning*.

187 Nene, S. A., Nayar, S. K., Murase, H., et al. (1996). Columbia object image library (coil-20).

188 Quessard, R., Barrett, T. D., and Clements, W. R. (2020). Learning Group Structure and Disentangled  
189 Representations of Dynamical Environments. *Advances in Neural Information Processing Systems*,  
190 33.

191 Soatto, S. (2011). Steps Towards a Theory of Visual Information: Active Perception, Signal-  
192 to-Symbol Conversion and the Interplay Between Sensing and Control. *arXiv preprint*  
193 *arXiv:1110.2053*.

194 TensorFlowDatasets, . (2021). TensorFlow Datasets, a collection of ready-to-use datasets. <https://www.tensorflow.org/datasets>.

195

196 Wu, Z., Song, S., Khosla, A., Yu, F., Zhang, L., Tang, X., and Xiao, J. (2014). 3D ShapeNets: A  
197 Deep Representation for Volumetric Shapes.

Table 5: Scores for the Square dataset.

| MODEL          | BETA $\uparrow$  | FACTOR $\uparrow$ | SAP $\uparrow$  | DCI $\uparrow$  | MIG $\uparrow$  | MOD $\uparrow$  | $\mathcal{D}_{\text{LSBD}}$ $\downarrow$ |
|----------------|------------------|-------------------|-----------------|-----------------|-----------------|-----------------|------------------------------------------|
| VAE            | .945 $\pm$ .061  | .835 $\pm$ .140   | .019 $\pm$ .004 | .009 $\pm$ .005 | .013 $\pm$ .004 | .579 $\pm$ .202 | .634 $\pm$ .440                          |
| $\beta$ -VAE   | .980 $\pm$ .033  | .913 $\pm$ .095   | .021 $\pm$ .006 | .017 $\pm$ .011 | .021 $\pm$ .014 | .642 $\pm$ .147 | .732 $\pm$ .488                          |
| CC-VAE         | .508 $\pm$ .023  | .000 $\pm$ .000   | .003 $\pm$ .002 | .007 $\pm$ .002 | .014 $\pm$ .004 | .222 $\pm$ .110 | 1.905 $\pm$ .023                         |
| FACTOR         | .974 $\pm$ .048  | .910 $\pm$ .104   | .020 $\pm$ .003 | .019 $\pm$ .017 | .017 $\pm$ .010 | .712 $\pm$ .183 | .667 $\pm$ .428                          |
| DIP-I          | .972 $\pm$ .042  | .861 $\pm$ .097   | .020 $\pm$ .005 | .010 $\pm$ .002 | .011 $\pm$ .002 | .618 $\pm$ .117 | 1.109 $\pm$ .312                         |
| DIP-II         | .930 $\pm$ .119  | .848 $\pm$ .137   | .018 $\pm$ .004 | .010 $\pm$ .004 | .015 $\pm$ .007 | .607 $\pm$ .207 | .907 $\pm$ .559                          |
| QUESSARD       | .504 $\pm$ .021  | .000 $\pm$ .000   | .004 $\pm$ .003 | .007 $\pm$ .004 | .018 $\pm$ .008 | .354 $\pm$ .213 | 1.686 $\pm$ .294                         |
| LSBD-VAE /0    | .970 $\pm$ .079  | .913 $\pm$ .121   | .018 $\pm$ .003 | .052 $\pm$ .052 | .018 $\pm$ .004 | .884 $\pm$ .183 | .749 $\pm$ .554                          |
| LSBD-VAE /256  | 1.000 $\pm$ .000 | 1.000 $\pm$ .001  | .021 $\pm$ .004 | .267 $\pm$ .152 | .027 $\pm$ .007 | .986 $\pm$ .023 | .104 $\pm$ .147                          |
| LSBD-VAE /512  | 1.000 $\pm$ .000 | 1.000 $\pm$ .000  | .021 $\pm$ .006 | .393 $\pm$ .022 | .025 $\pm$ .005 | .999 $\pm$ .000 | .000 $\pm$ .000                          |
| LSBD-VAE /768  | 1.000 $\pm$ .000 | 1.000 $\pm$ .000  | .019 $\pm$ .004 | .387 $\pm$ .014 | .025 $\pm$ .004 | .999 $\pm$ .000 | .000 $\pm$ .000                          |
| LSBD-VAE /1024 | 1.000 $\pm$ .000 | 1.000 $\pm$ .000  | .022 $\pm$ .005 | .398 $\pm$ .020 | .024 $\pm$ .003 | .999 $\pm$ .000 | .000 $\pm$ .000                          |
| LSBD-VAE /1280 | 1.000 $\pm$ .000 | 1.000 $\pm$ .000  | .023 $\pm$ .003 | .389 $\pm$ .016 | .023 $\pm$ .003 | .999 $\pm$ .000 | .000 $\pm$ .000                          |
| LSBD-VAE /1536 | 1.000 $\pm$ .000 | 1.000 $\pm$ .000  | .022 $\pm$ .004 | .398 $\pm$ .013 | .027 $\pm$ .002 | .999 $\pm$ .000 | .000 $\pm$ .000                          |
| LSBD-VAE /1792 | 1.000 $\pm$ .000 | 1.000 $\pm$ .000  | .020 $\pm$ .004 | .397 $\pm$ .016 | .027 $\pm$ .005 | .999 $\pm$ .000 | .000 $\pm$ .000                          |
| LSBD-VAE /2048 | 1.000 $\pm$ .000 | 1.000 $\pm$ .000  | .021 $\pm$ .006 | .380 $\pm$ .027 | .027 $\pm$ .005 | .999 $\pm$ .000 | .000 $\pm$ .000                          |



Table 6: Scores for the Arrow dataset.

| MODEL             | BETA $\uparrow$  | FACTOR $\uparrow$ | SAP $\uparrow$  | DCI $\uparrow$  | MIG $\uparrow$  | MOD $\uparrow$  | $\mathcal{D}_{\text{LSBD}}$ $\downarrow$ |
|-------------------|------------------|-------------------|-----------------|-----------------|-----------------|-----------------|------------------------------------------|
| VAE               | 1.000 $\pm$ .000 | .646 $\pm$ .032   | .017 $\pm$ .004 | .009 $\pm$ .003 | .013 $\pm$ .004 | .961 $\pm$ .012 | 1.316 $\pm$ .193                         |
| $\beta$ -VAE      | .999 $\pm$ .002  | .588 $\pm$ .045   | .018 $\pm$ .004 | .008 $\pm$ .002 | .015 $\pm$ .005 | .898 $\pm$ .032 | 1.178 $\pm$ .065                         |
| CC-VAE            | .982 $\pm$ .056  | .707 $\pm$ .102   | .019 $\pm$ .004 | .011 $\pm$ .005 | .016 $\pm$ .004 | .980 $\pm$ .038 | 1.013 $\pm$ .096                         |
| FACTOR            | 1.000 $\pm$ .000 | .659 $\pm$ .028   | .017 $\pm$ .003 | .008 $\pm$ .003 | .014 $\pm$ .002 | .935 $\pm$ .037 | 1.526 $\pm$ .125                         |
| DIP-I             | 1.000 $\pm$ .000 | .624 $\pm$ .042   | .020 $\pm$ .004 | .008 $\pm$ .002 | .012 $\pm$ .003 | .967 $\pm$ .027 | 1.521 $\pm$ .113                         |
| DIP-II            | 1.000 $\pm$ .000 | .644 $\pm$ .064   | .020 $\pm$ .004 | .009 $\pm$ .003 | .013 $\pm$ .004 | .973 $\pm$ .011 | 1.616 $\pm$ .102                         |
| QUESSARD          | 1.000 $\pm$ .000 | .596 $\pm$ .032   | .016 $\pm$ .006 | .008 $\pm$ .004 | .017 $\pm$ .008 | .999 $\pm$ .000 | 1.183 $\pm$ .412                         |
| LSBD-VAE<br>/0    | 1.000 $\pm$ .001 | .664 $\pm$ .105   | .016 $\pm$ .002 | .009 $\pm$ .004 | .019 $\pm$ .005 | .897 $\pm$ .108 | 1.627 $\pm$ .104                         |
| LSBD-VAE<br>/256  | 1.000 $\pm$ .000 | .662 $\pm$ .046   | .017 $\pm$ .005 | .009 $\pm$ .004 | .020 $\pm$ .005 | .963 $\pm$ .010 | 1.475 $\pm$ .121                         |
| LSBD-VAE<br>/512  | 1.000 $\pm$ .000 | .956 $\pm$ .119   | .021 $\pm$ .006 | .297 $\pm$ .157 | .023 $\pm$ .003 | .967 $\pm$ .092 | .245 $\pm$ .474                          |
| LSBD-VAE<br>/768  | 1.000 $\pm$ .000 | 1.000 $\pm$ .000  | .022 $\pm$ .006 | .390 $\pm$ .022 | .026 $\pm$ .003 | .999 $\pm$ .000 | .000 $\pm$ .000                          |
| LSBD-VAE<br>/1024 | 1.000 $\pm$ .000 | 1.000 $\pm$ .000  | .022 $\pm$ .003 | .396 $\pm$ .026 | .026 $\pm$ .006 | .999 $\pm$ .000 | .000 $\pm$ .000                          |
| LSBD-VAE<br>/1280 | 1.000 $\pm$ .000 | 1.000 $\pm$ .000  | .019 $\pm$ .005 | .401 $\pm$ .018 | .026 $\pm$ .004 | .999 $\pm$ .000 | .000 $\pm$ .000                          |
| LSBD-VAE<br>/1536 | 1.000 $\pm$ .000 | 1.000 $\pm$ .000  | .019 $\pm$ .005 | .397 $\pm$ .017 | .026 $\pm$ .007 | .999 $\pm$ .000 | .000 $\pm$ .000                          |
| LSBD-VAE<br>/1792 | 1.000 $\pm$ .000 | 1.000 $\pm$ .000  | .020 $\pm$ .004 | .399 $\pm$ .018 | .026 $\pm$ .004 | .999 $\pm$ .000 | .000 $\pm$ .000                          |
| LSBD-VAE<br>/2048 | 1.000 $\pm$ .000 | 1.000 $\pm$ .000  | .020 $\pm$ .006 | .444 $\pm$ .186 | .027 $\pm$ .004 | .999 $\pm$ .000 | .000 $\pm$ .000                          |

Table 7: Scores for the Airplane dataset.

| MODEL          | BETA $\uparrow$  | FACTOR $\uparrow$ | SAP $\uparrow$  | DCI $\uparrow$  | MIG $\uparrow$  | MOD $\uparrow$  | $\mathcal{D}_{\text{LSBD}}$ $\downarrow$ |
|----------------|------------------|-------------------|-----------------|-----------------|-----------------|-----------------|------------------------------------------|
| VAE            | 1.000 $\pm$ .001 | .947 $\pm$ .054   | .023 $\pm$ .005 | .013 $\pm$ .005 | .020 $\pm$ .017 | .801 $\pm$ .045 | 1.342 $\pm$ .084                         |
| $\beta$ -VAE   | 1.000 $\pm$ .001 | .997 $\pm$ .005   | .018 $\pm$ .005 | .036 $\pm$ .012 | .028 $\pm$ .012 | .816 $\pm$ .104 | 1.481 $\pm$ .129                         |
| CC-VAE         | .858 $\pm$ .194  | .646 $\pm$ .353   | .010 $\pm$ .006 | .021 $\pm$ .011 | .018 $\pm$ .009 | .969 $\pm$ .034 | 1.481 $\pm$ .174                         |
| FACTOR         | 1.000 $\pm$ .000 | .984 $\pm$ .015   | .020 $\pm$ .003 | .021 $\pm$ .008 | .026 $\pm$ .013 | .810 $\pm$ .040 | 1.382 $\pm$ .171                         |
| DIP-I          | 1.000 $\pm$ .000 | .994 $\pm$ .008   | .022 $\pm$ .004 | .029 $\pm$ .012 | .026 $\pm$ .012 | .842 $\pm$ .073 | 1.289 $\pm$ .150                         |
| DIP-II         | .998 $\pm$ .005  | .972 $\pm$ .031   | .021 $\pm$ .004 | .022 $\pm$ .013 | .030 $\pm$ .019 | .780 $\pm$ .054 | 1.367 $\pm$ .129                         |
| QUESSARD       | .999 $\pm$ .003  | .987 $\pm$ .026   | .018 $\pm$ .007 | .016 $\pm$ .009 | .018 $\pm$ .005 | .795 $\pm$ .107 | .558 $\pm$ .239                          |
| LSBD-VAE /0    | .536 $\pm$ .065  | .000 $\pm$ .000   | .002 $\pm$ .001 | .007 $\pm$ .004 | .005 $\pm$ .003 | .956 $\pm$ .046 | 1.165 $\pm$ .180                         |
| LSBD-VAE /256  | 1.000 $\pm$ .000 | 1.000 $\pm$ .000  | .022 $\pm$ .006 | .144 $\pm$ .011 | .023 $\pm$ .004 | .870 $\pm$ .039 | .153 $\pm$ .021                          |
| LSBD-VAE /512  | 1.000 $\pm$ .000 | 1.000 $\pm$ .000  | .023 $\pm$ .008 | .151 $\pm$ .015 | .020 $\pm$ .004 | .846 $\pm$ .032 | .168 $\pm$ .022                          |
| LSBD-VAE /768  | 1.000 $\pm$ .000 | 1.000 $\pm$ .000  | .022 $\pm$ .004 | .140 $\pm$ .014 | .022 $\pm$ .005 | .832 $\pm$ .034 | .180 $\pm$ .030                          |
| LSBD-VAE /1024 | 1.000 $\pm$ .000 | 1.000 $\pm$ .000  | .020 $\pm$ .005 | .160 $\pm$ .015 | .022 $\pm$ .005 | .859 $\pm$ .032 | .165 $\pm$ .021                          |
| LSBD-VAE /1280 | 1.000 $\pm$ .000 | 1.000 $\pm$ .000  | .024 $\pm$ .004 | .153 $\pm$ .013 | .022 $\pm$ .003 | .876 $\pm$ .016 | .151 $\pm$ .015                          |
| LSBD-VAE /1536 | 1.000 $\pm$ .000 | 1.000 $\pm$ .000  | .021 $\pm$ .005 | .160 $\pm$ .016 | .022 $\pm$ .004 | .896 $\pm$ .025 | .140 $\pm$ .018                          |
| LSBD-VAE /1792 | 1.000 $\pm$ .000 | 1.000 $\pm$ .000  | .022 $\pm$ .005 | .163 $\pm$ .022 | .023 $\pm$ .003 | .904 $\pm$ .016 | .138 $\pm$ .010                          |
| LSBD-VAE /2048 | 1.000 $\pm$ .000 | 1.000 $\pm$ .000  | .016 $\pm$ .008 | .161 $\pm$ .024 | .021 $\pm$ .006 | .913 $\pm$ .018 | .132 $\pm$ .009                          |

Table 8: Scores for the Modelnet40 Airplanes dataset.

| MODEL         | BETA $\uparrow$  | FACTOR $\uparrow$ | SAP $\uparrow$  | DCI $\uparrow$  | MIG $\uparrow$  | MOD $\uparrow$  | $\mathcal{D}_{\text{LSBD}}$ $\downarrow$ |
|---------------|------------------|-------------------|-----------------|-----------------|-----------------|-----------------|------------------------------------------|
| VAE           | .995 $\pm$ .004  | .838 $\pm$ .030   | .013 $\pm$ .002 | .013 $\pm$ .002 | .009 $\pm$ .002 | .415 $\pm$ .058 | .393 $\pm$ .110                          |
| $\beta$ -VAE  | .995 $\pm$ .005  | .857 $\pm$ .045   | .012 $\pm$ .003 | .015 $\pm$ .003 | .009 $\pm$ .002 | .447 $\pm$ .067 | .285 $\pm$ .045                          |
| CC-VAE        | .997 $\pm$ .003  | .818 $\pm$ .093   | .011 $\pm$ .003 | .017 $\pm$ .004 | .011 $\pm$ .003 | .567 $\pm$ .063 | .281 $\pm$ .191                          |
| FACTOR        | .996 $\pm$ .004  | .856 $\pm$ .052   | .012 $\pm$ .002 | .014 $\pm$ .003 | .010 $\pm$ .003 | .444 $\pm$ .077 | .388 $\pm$ .096                          |
| DIP-I         | .988 $\pm$ .009  | .783 $\pm$ .070   | .012 $\pm$ .002 | .013 $\pm$ .002 | .008 $\pm$ .001 | .343 $\pm$ .082 | .416 $\pm$ .142                          |
| DIP-II        | .994 $\pm$ .006  | .832 $\pm$ .042   | .013 $\pm$ .003 | .014 $\pm$ .003 | .011 $\pm$ .002 | .433 $\pm$ .080 | .379 $\pm$ .130                          |
| QUESSARD      | .907 $\pm$ .192  | .727 $\pm$ .384   | .010 $\pm$ .005 | .015 $\pm$ .007 | .009 $\pm$ .004 | .563 $\pm$ .108 | .134 $\pm$ .294                          |
| LSBD-VAE /0   | .990 $\pm$ .009  | .863 $\pm$ .038   | .011 $\pm$ .003 | .015 $\pm$ .003 | .014 $\pm$ .003 | .538 $\pm$ .103 | .731 $\pm$ .068                          |
| LSBD-VAE /256 | 1.000 $\pm$ .000 | .990 $\pm$ .004   | .012 $\pm$ .005 | .052 $\pm$ .009 | .020 $\pm$ .006 | .947 $\pm$ .007 | .041 $\pm$ .007                          |

Table 9: Scores for COIL 100 dataset.

| MODEL            | BETA $\uparrow$  | FACTOR $\uparrow$ | SAP $\uparrow$  | DCI $\uparrow$  | MIG $\uparrow$  | MOD $\uparrow$  | $\mathcal{D}_{\text{LSBD}}$ $\downarrow$ |
|------------------|------------------|-------------------|-----------------|-----------------|-----------------|-----------------|------------------------------------------|
| VAE              | 1.000 $\pm$ .000 | .674 $\pm$ .049   | .014 $\pm$ .003 | .016 $\pm$ .003 | .011 $\pm$ .002 | .986 $\pm$ .001 | .463 $\pm$ .030                          |
| $\beta$ -VAE     | 1.000 $\pm$ .001 | .740 $\pm$ .024   | .015 $\pm$ .004 | .014 $\pm$ .004 | .013 $\pm$ .003 | .982 $\pm$ .001 | .579 $\pm$ .095                          |
| CC-VAE           | .999 $\pm$ .003  | .723 $\pm$ .026   | .013 $\pm$ .005 | .014 $\pm$ .003 | .013 $\pm$ .004 | .985 $\pm$ .001 | .406 $\pm$ .057                          |
| FACTOR           | 1.000 $\pm$ .001 | .684 $\pm$ .041   | .014 $\pm$ .002 | .012 $\pm$ .002 | .013 $\pm$ .004 | .984 $\pm$ .001 | .490 $\pm$ .024                          |
| DIP-I            | .999 $\pm$ .002  | .631 $\pm$ .025   | .013 $\pm$ .004 | .012 $\pm$ .002 | .010 $\pm$ .002 | .986 $\pm$ .001 | .525 $\pm$ .109                          |
| DIP-II           | 1.000 $\pm$ .001 | .643 $\pm$ .043   | .013 $\pm$ .003 | .014 $\pm$ .002 | .011 $\pm$ .002 | .985 $\pm$ .001 | .568 $\pm$ .079                          |
| QUESSARD         | 1.000 $\pm$ .000 | .780 $\pm$ .044   | .014 $\pm$ .004 | .014 $\pm$ .002 | .011 $\pm$ .003 | .973 $\pm$ .004 | .396 $\pm$ .055                          |
| LSBD-VAE<br>/0   | 1.000 $\pm$ .001 | .739 $\pm$ .047   | .014 $\pm$ .003 | .014 $\pm$ .001 | .011 $\pm$ .001 | .982 $\pm$ .004 | .515 $\pm$ .099                          |
| LSBD-VAE<br>/256 | 1.000 $\pm$ .000 | .655 $\pm$ .028   | .015 $\pm$ .004 | .029 $\pm$ .003 | .013 $\pm$ .003 | .802 $\pm$ .056 | .112 $\pm$ .026                          |
